# Supplementary material for: eIF4A inactivates TORC1 in response to amino acid starvation
Source: PubMed Central journal article supplement (PMC4868951; doi:10.15252/embj.201593118), 2016-03-17

# Figure 5a

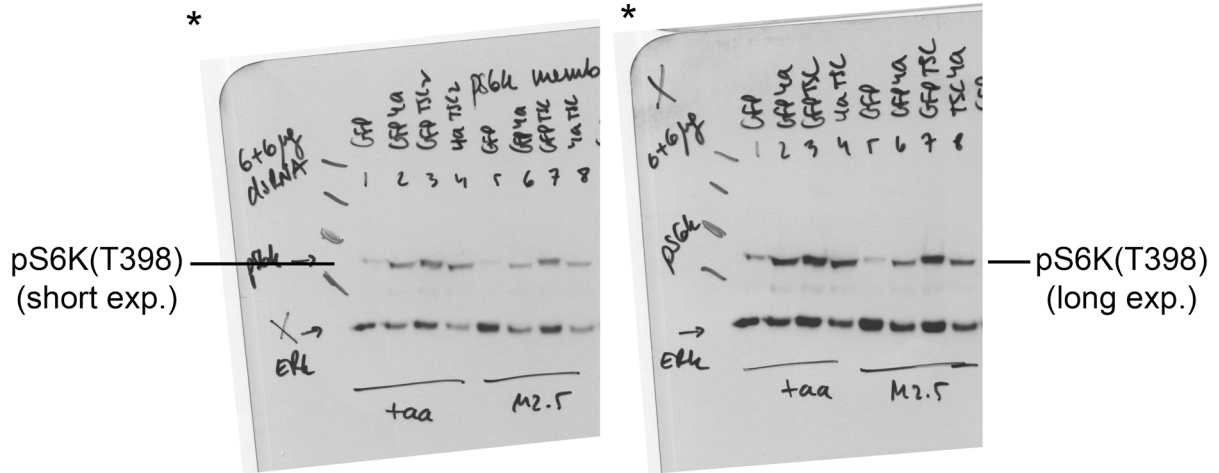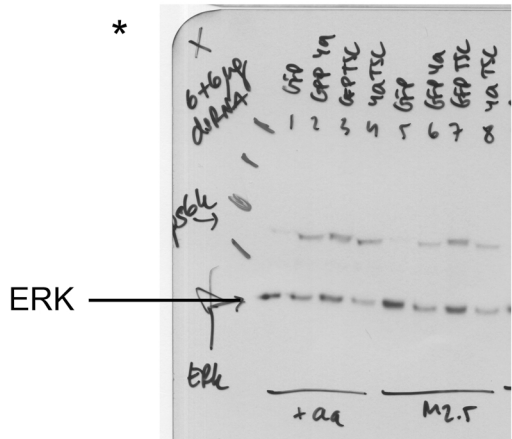

\* The membrane was co-incubated with the pS6K and ERK antibodies. Different exposures were used for the figure.

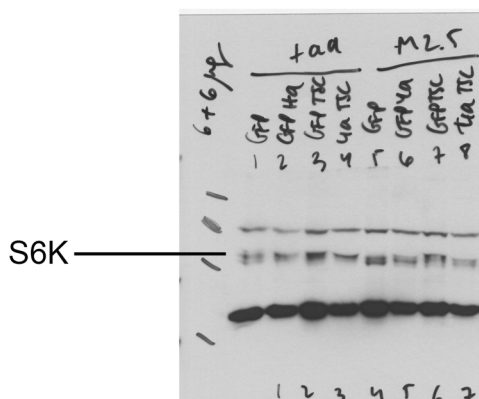

The membrane was co-incubated with the S6K and ERK antibodies.

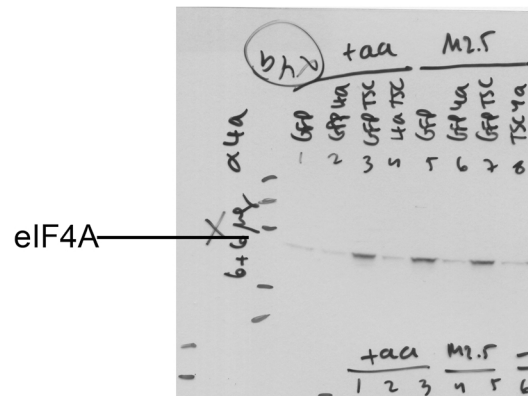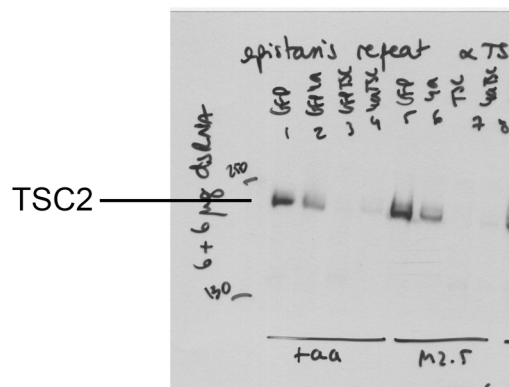

# Figure 5b

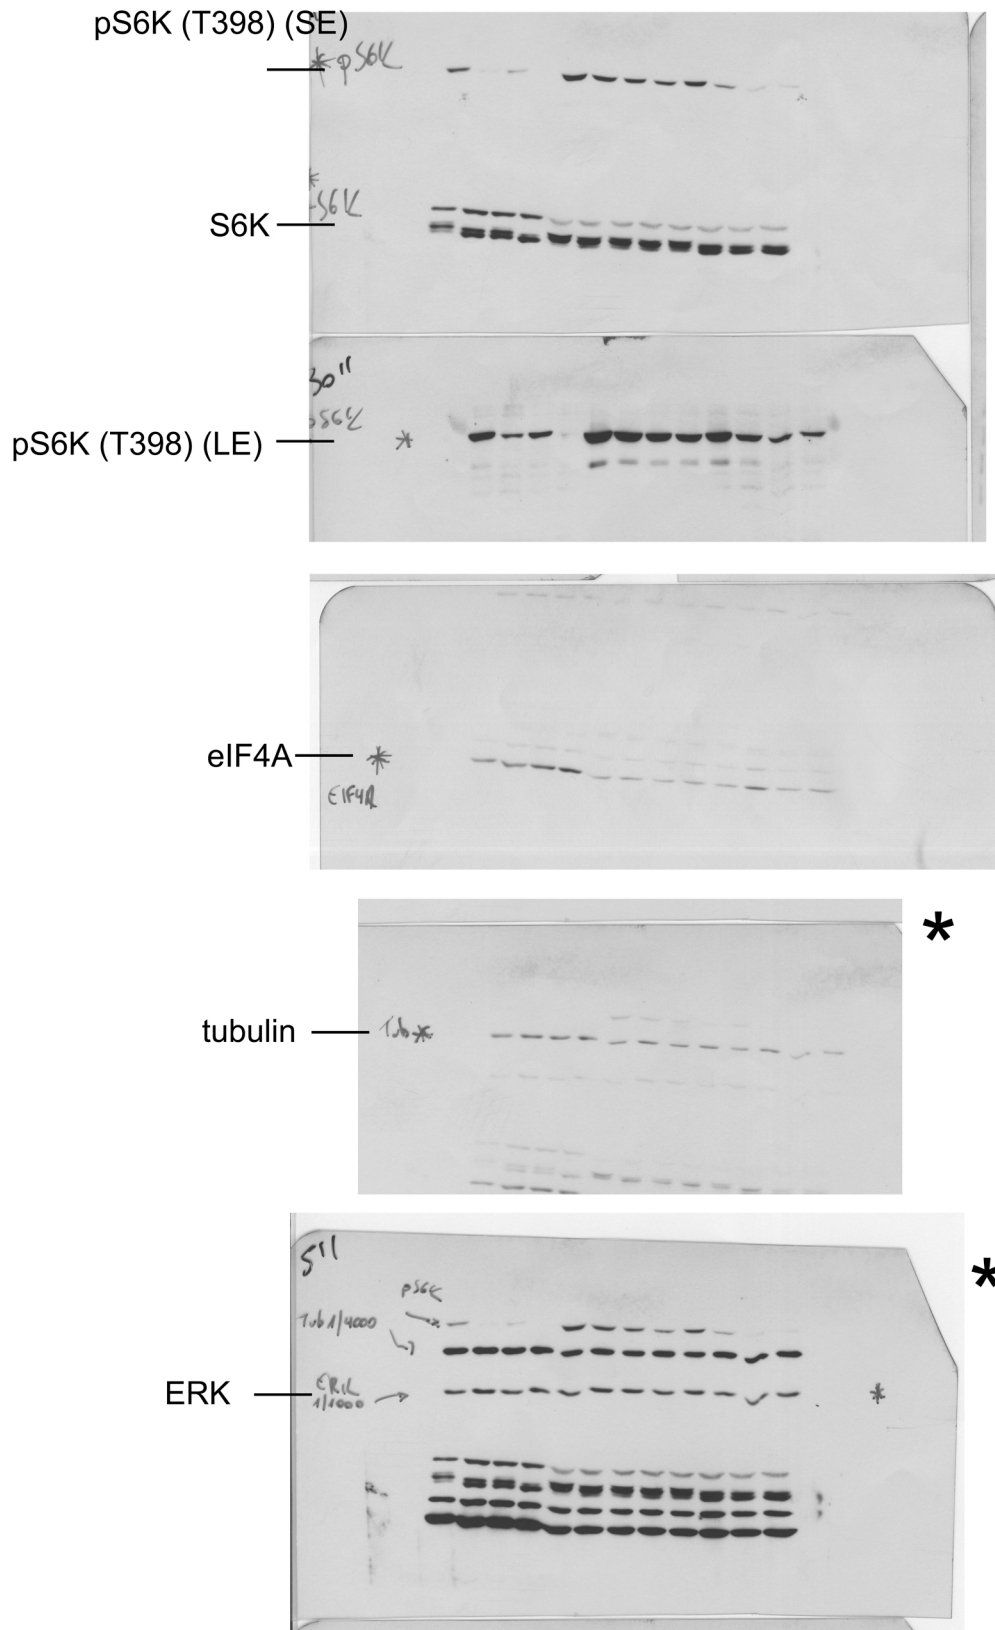

\*The membrane of pS6K was reblotted with the anti-ERK and anti-tubulin antibody

# Figure 5c

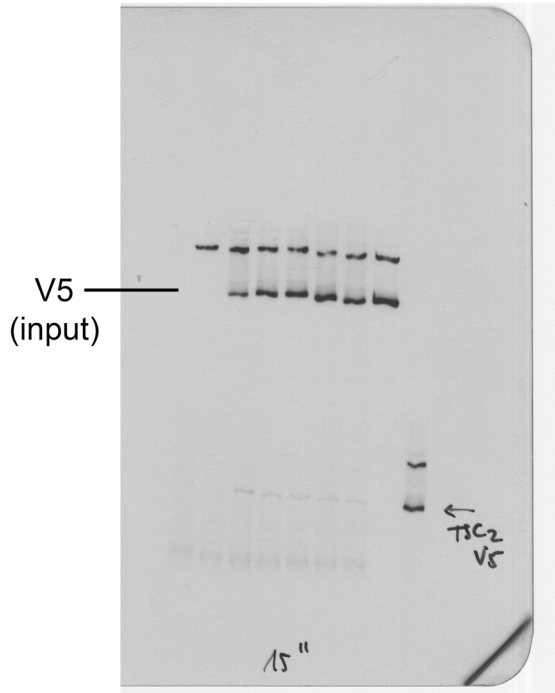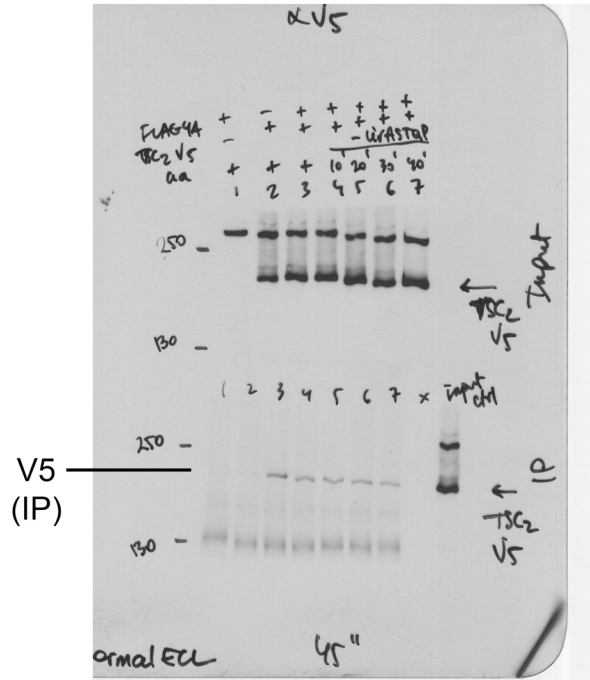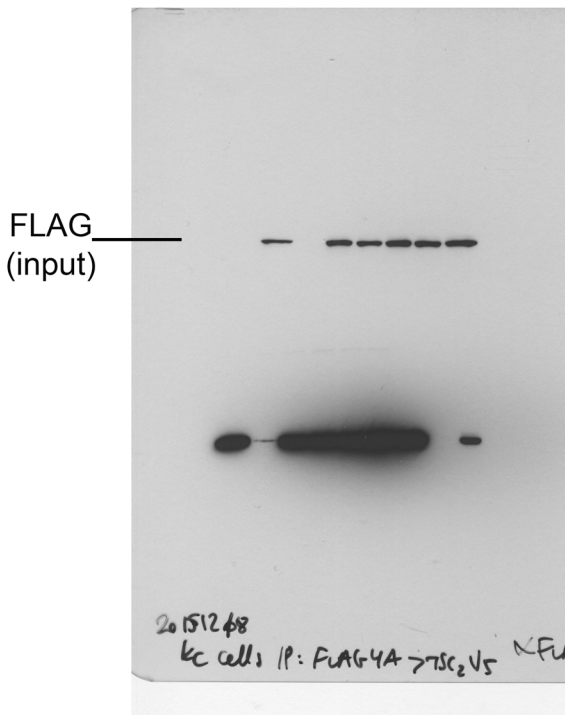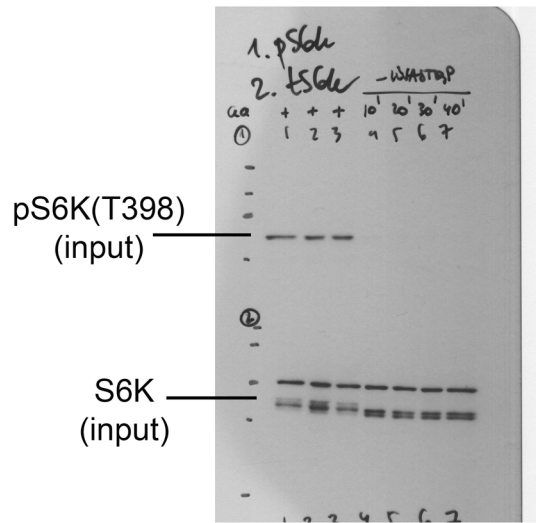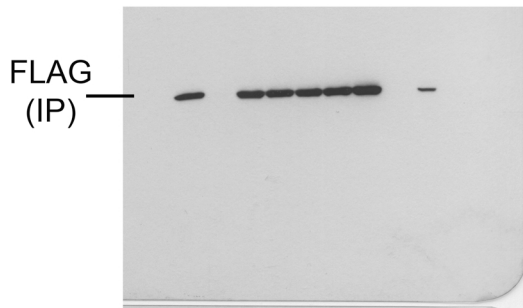

# Figure 5d

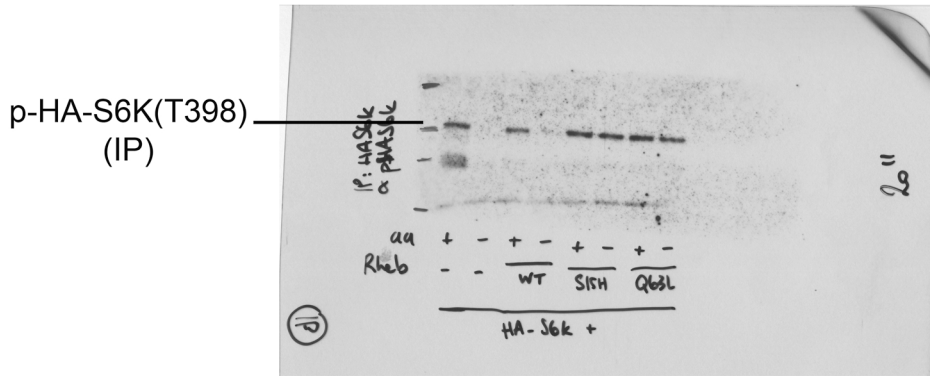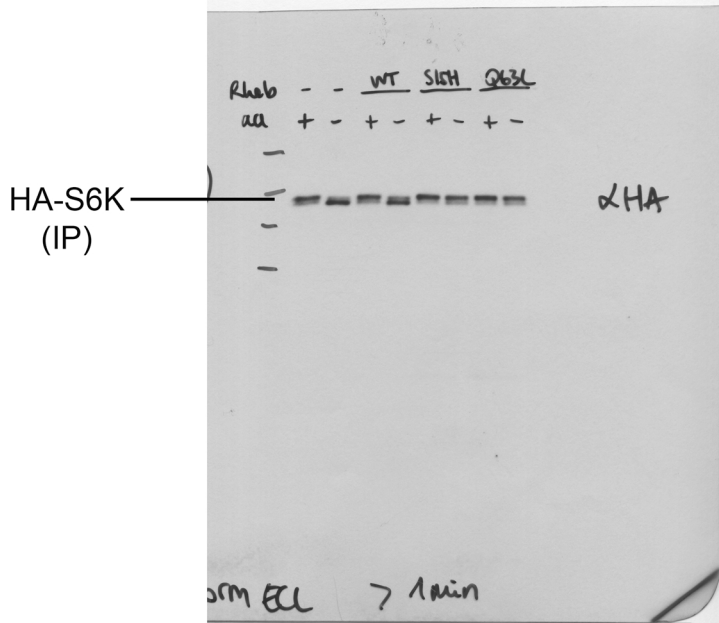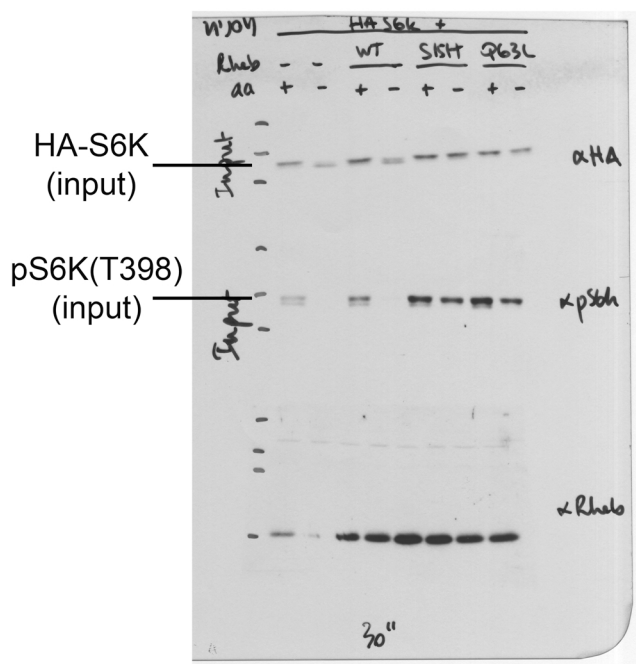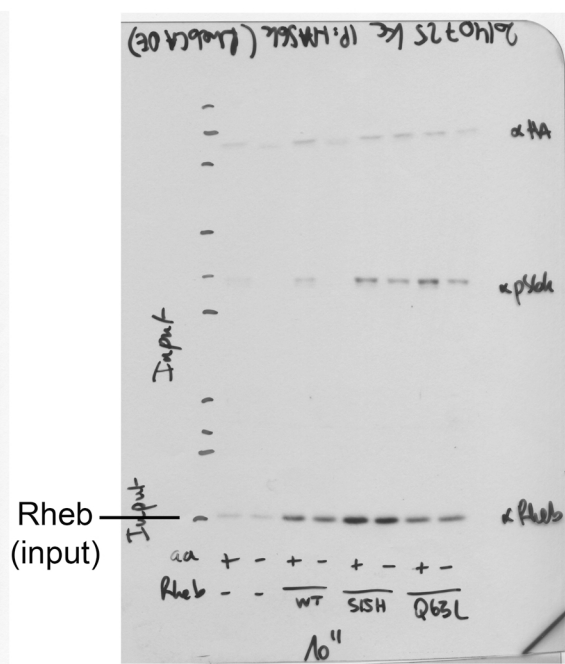

Supplement: EMBJ-35-1058-s007.pdf [file EMBJ-35-1058-s007.pdf]
