# Supplementary material for: eIF4A inactivates TORC1 in response to amino acid starvation
Source: PubMed Central journal article supplement (PMC4868951; doi:10.15252/embj.201593118), 2016-03-17
Supplement: EMBJ-35-1058-s003.pdf [file EMBJ-35-1058-s003.pdf]

# Figure 1a

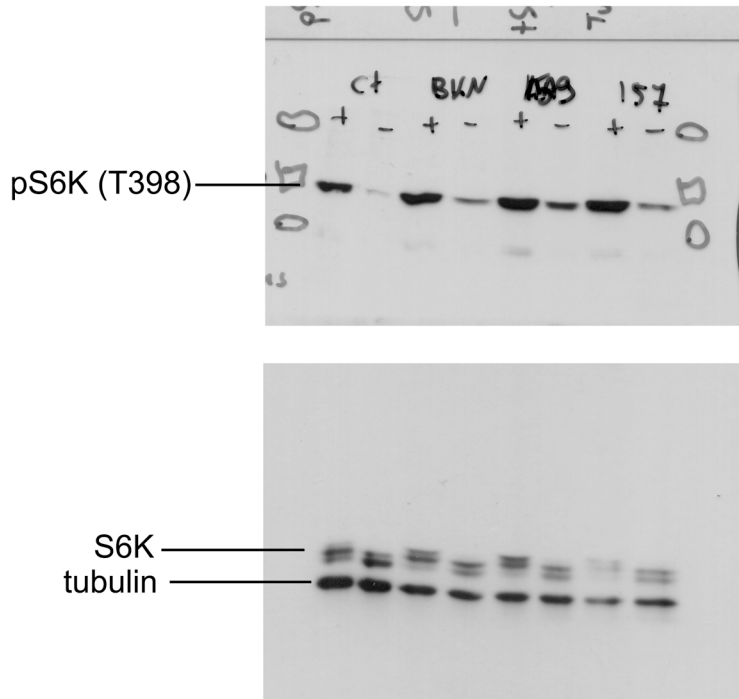

The membrane was co-incubated with anti-S6K and anti-tubulin antibody.

# Figure 1b

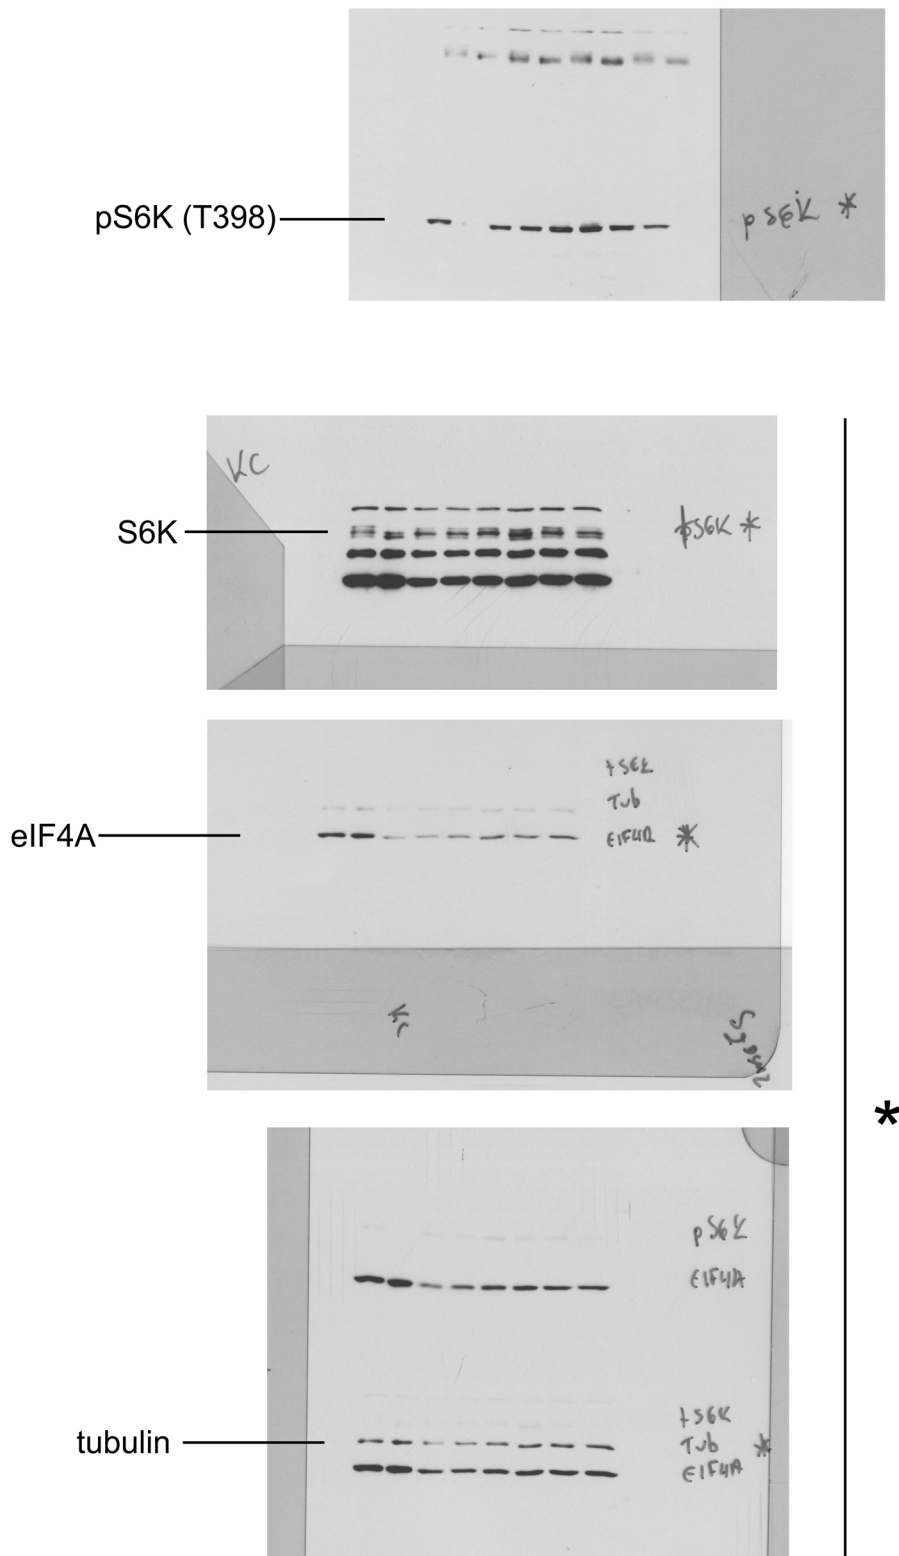

\* The membrane was co-incubated with anti-S6K, anti-tubulin and anti-eIF4A and antibody. Different exposures were used for the figure.

# Figure 1e

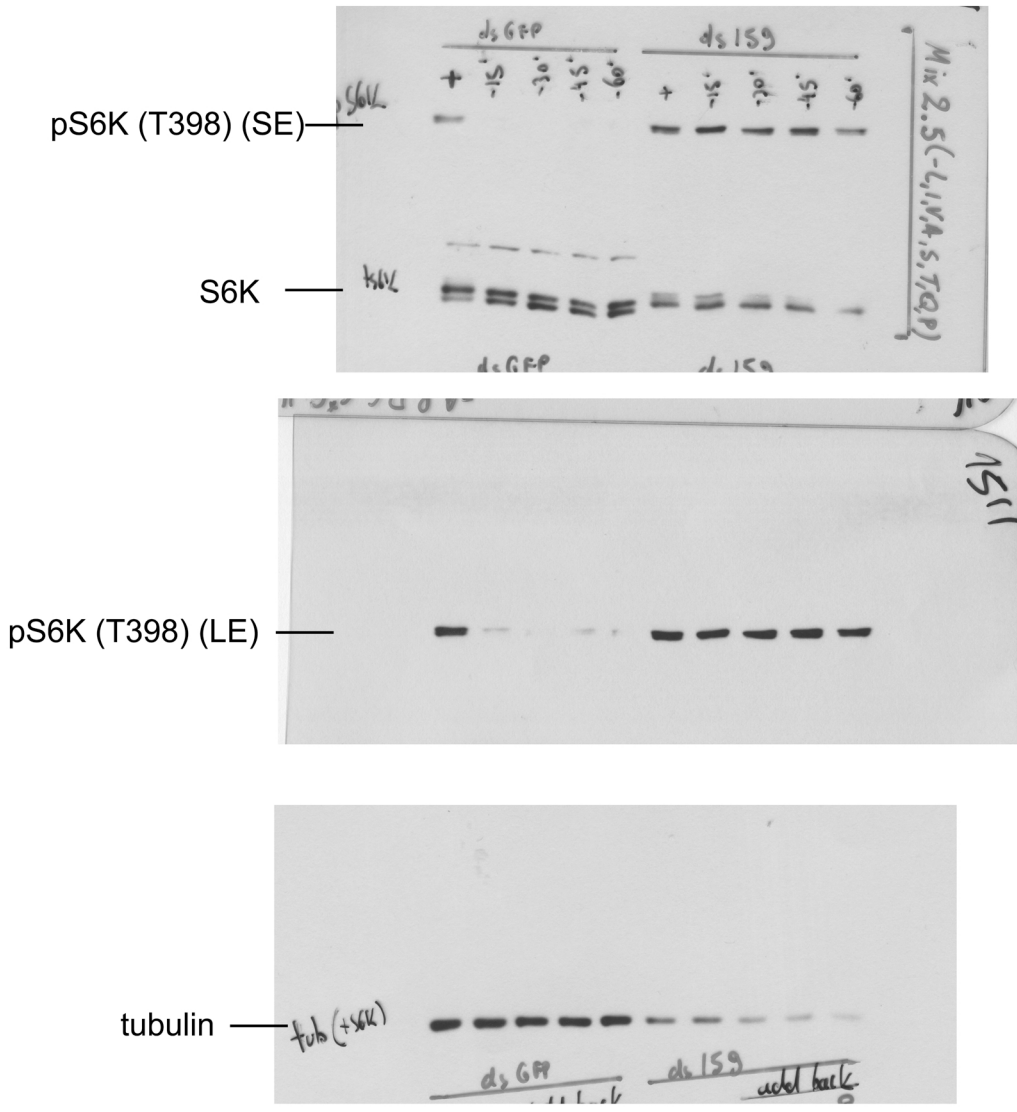

# Figure 1f

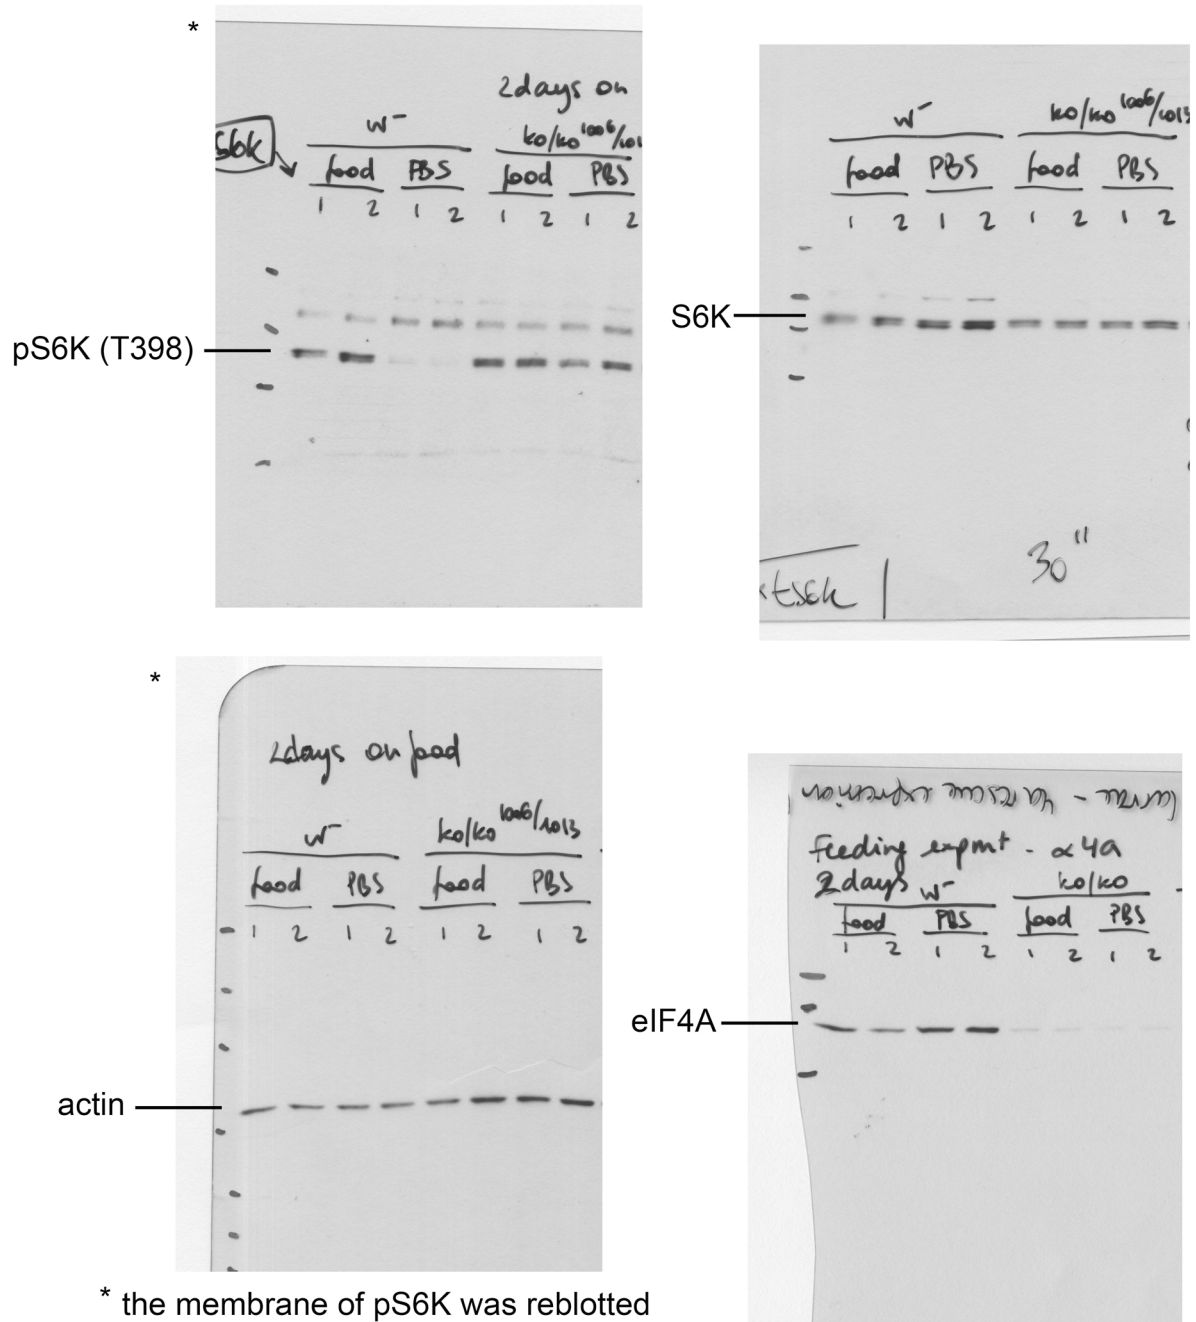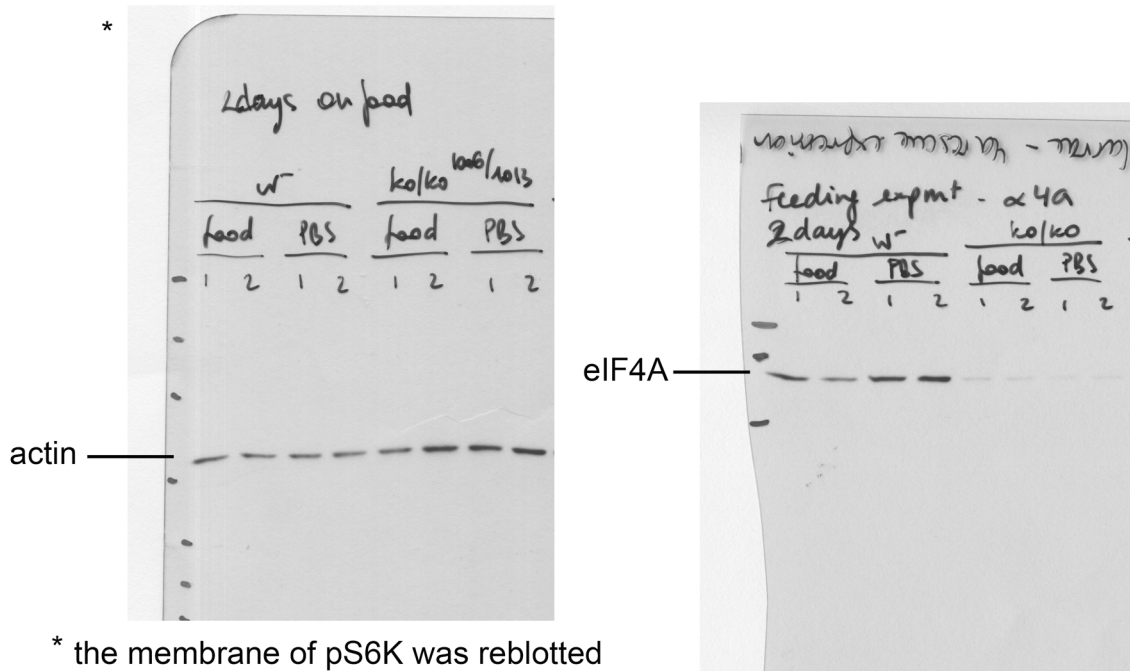

\* the membrane of pS6K was reblotted with the mouse anti-actin antibody.
