# Supplementary material for: eIF4A inactivates TORC1 in response to amino acid starvation
Source: PubMed Central journal article supplement (PMC4868951; doi:10.15252/embj.201593118), 2016-03-17
Supplement: EMBJ-35-1058-s004.pdf [file EMBJ-35-1058-s004.pdf]

# Figure 2

a

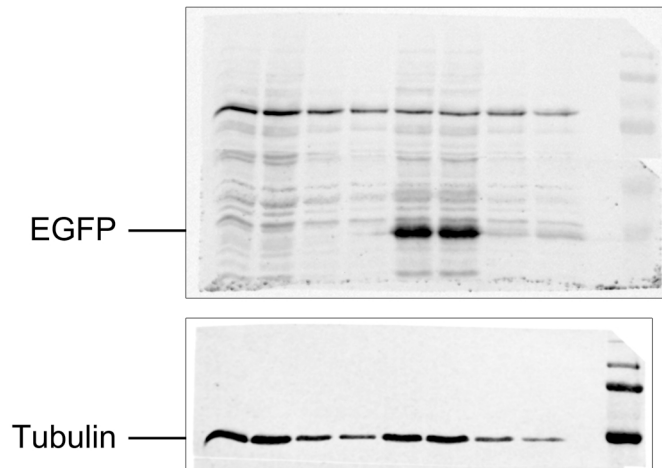

a'

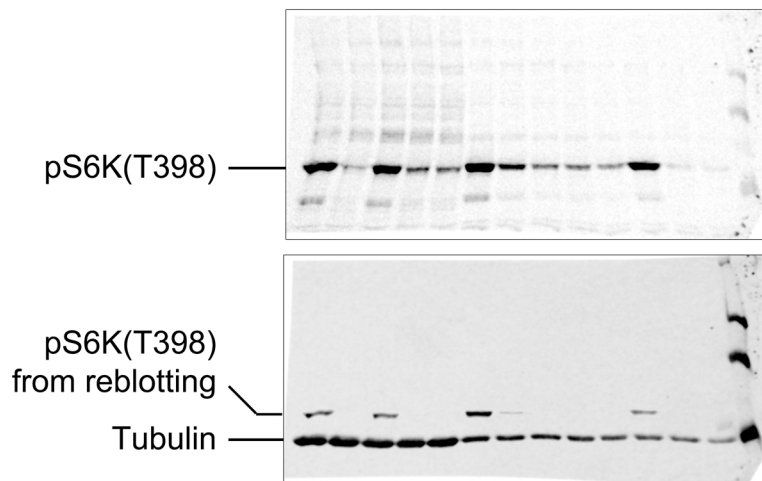

# Figure 2b 1/3

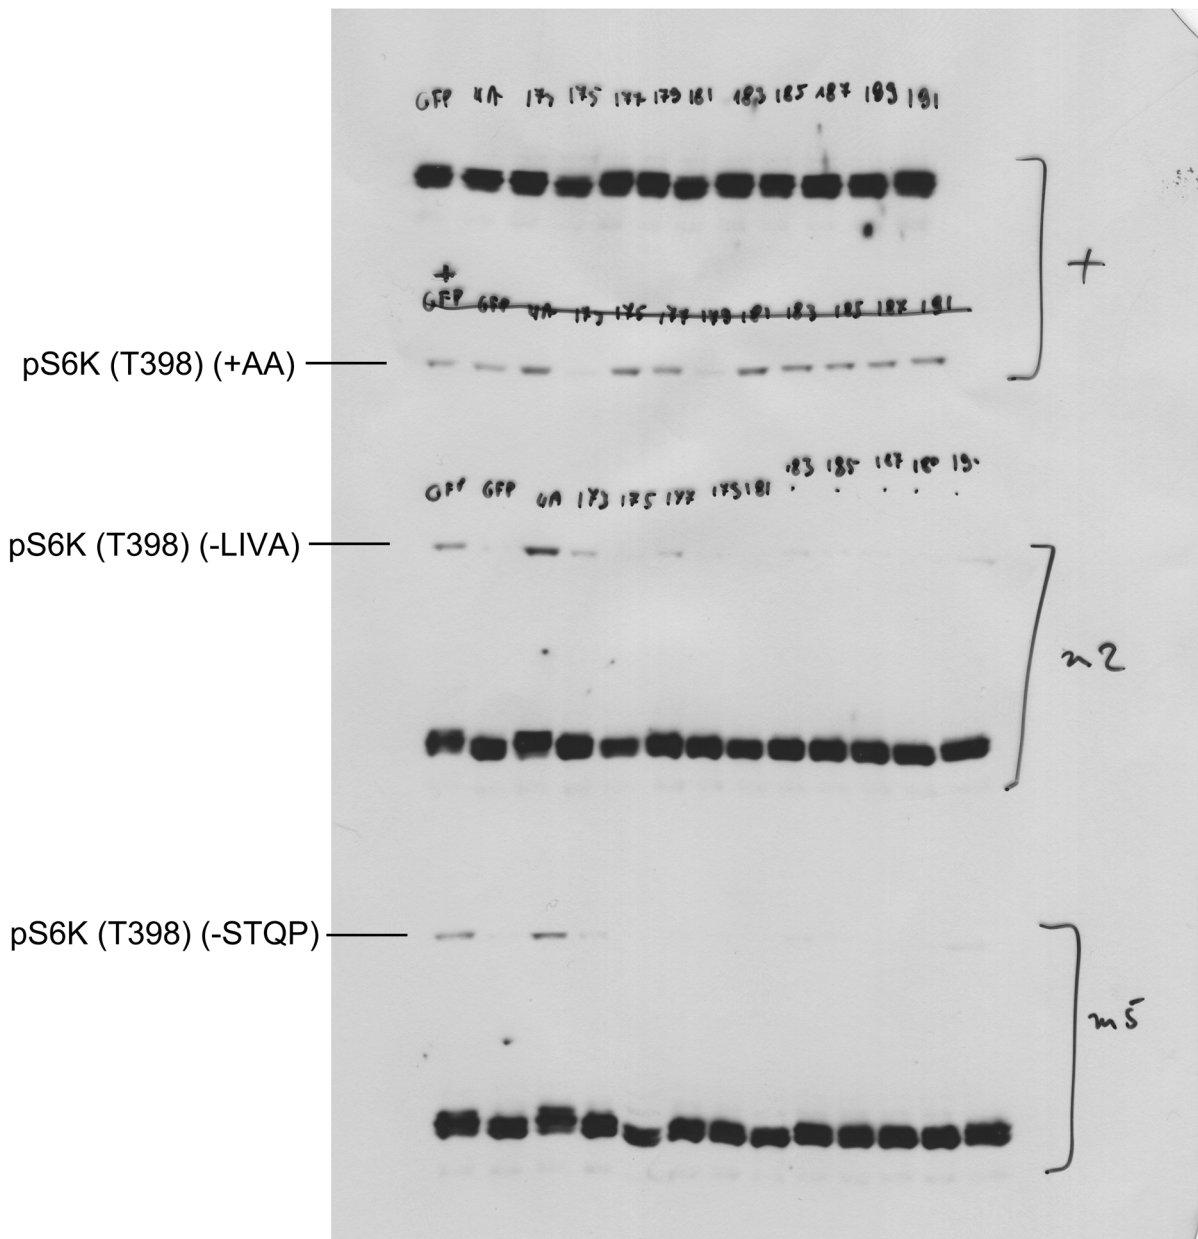

# Figure 2b 2/3

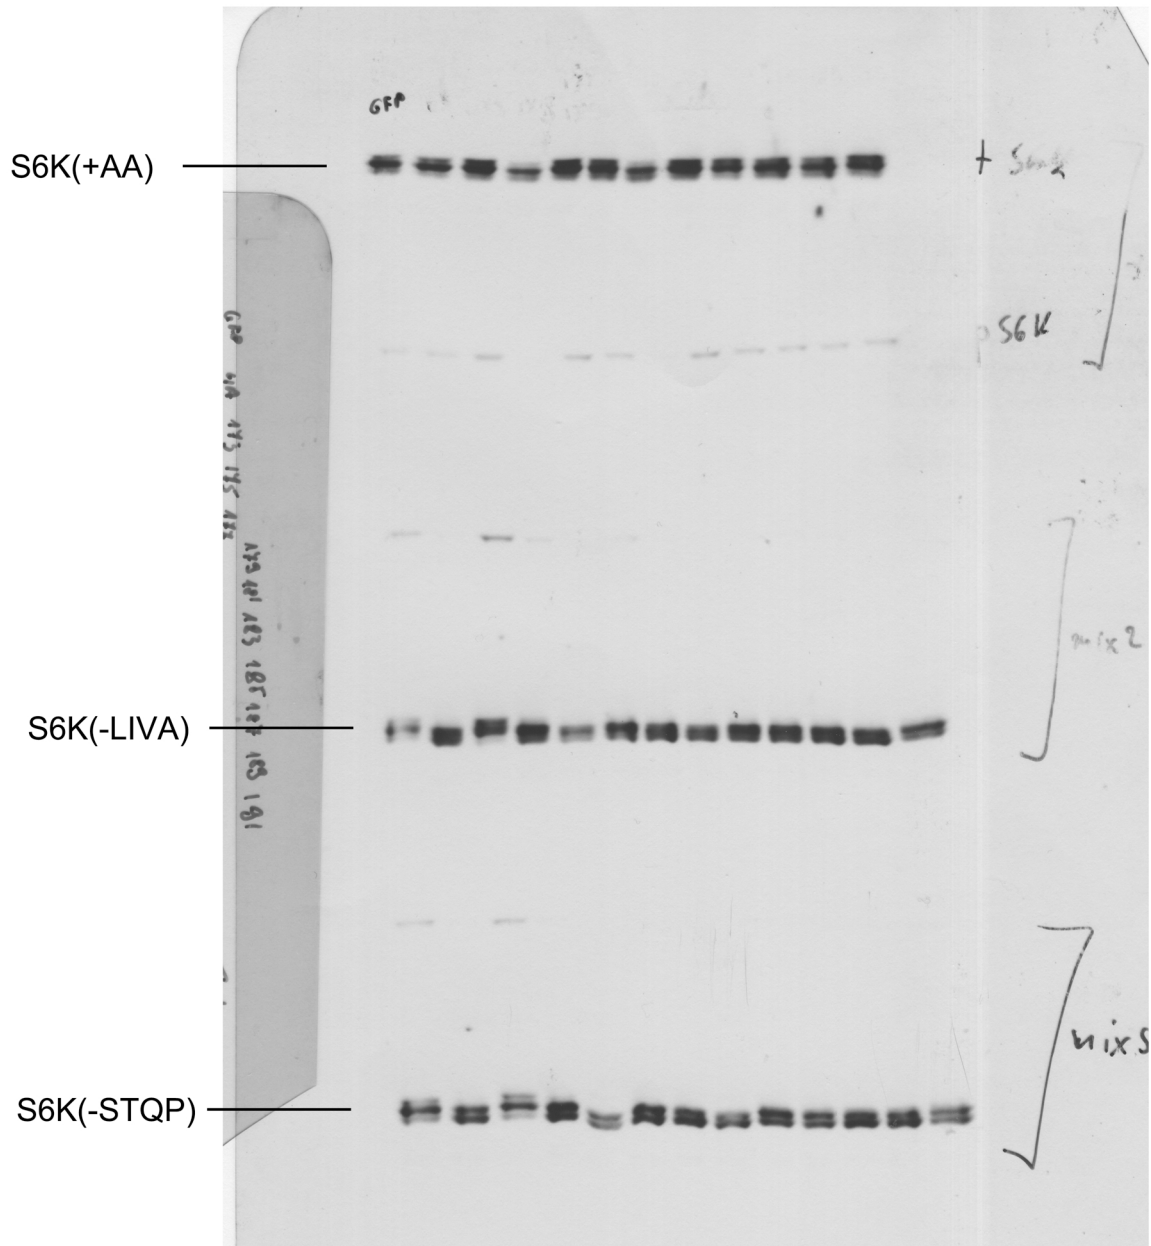

# Figure 2b 3/3

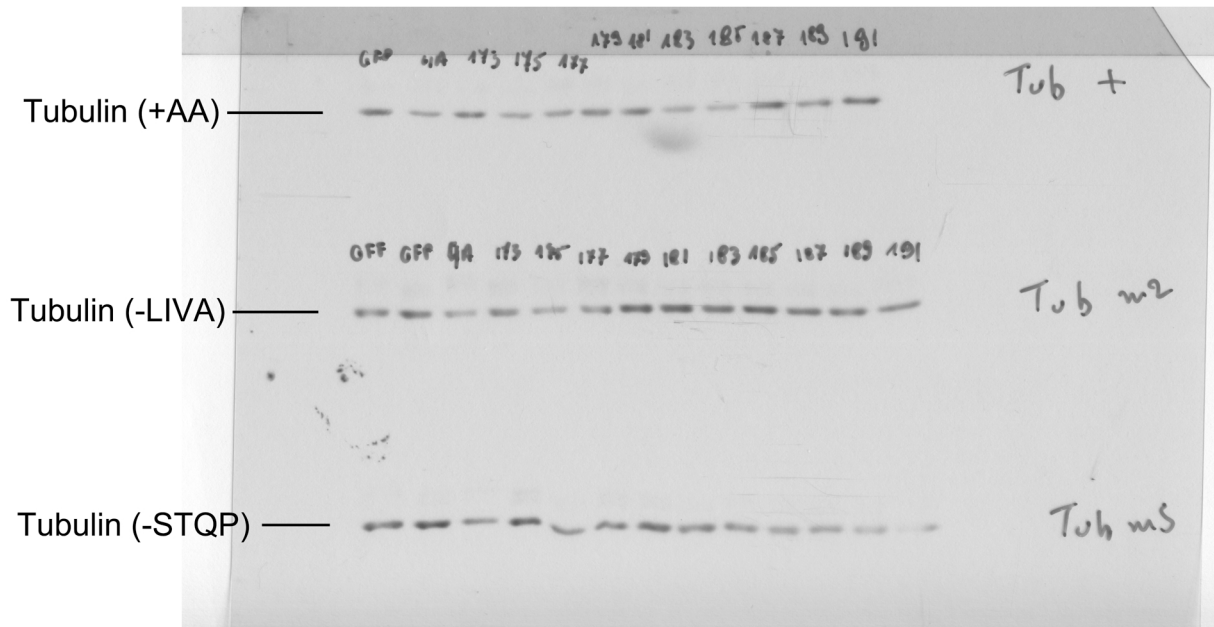

# Figure 2c

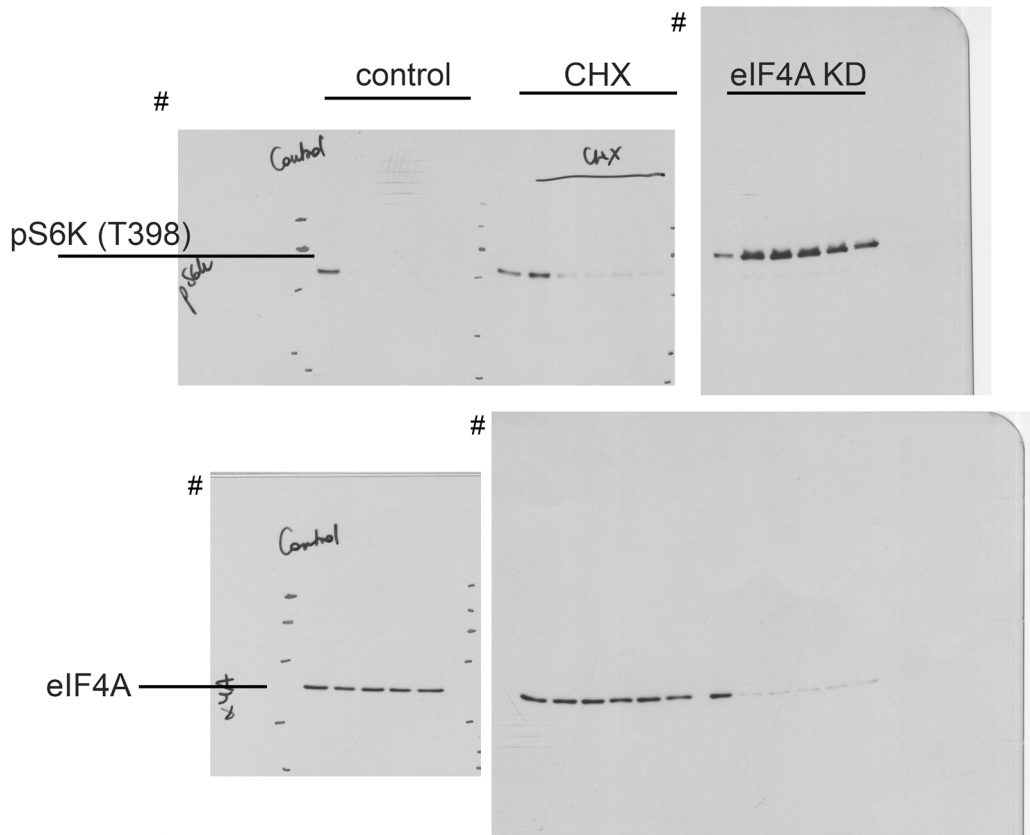

# The membranes of pS6K were reblotted with the eIF4A antibody.

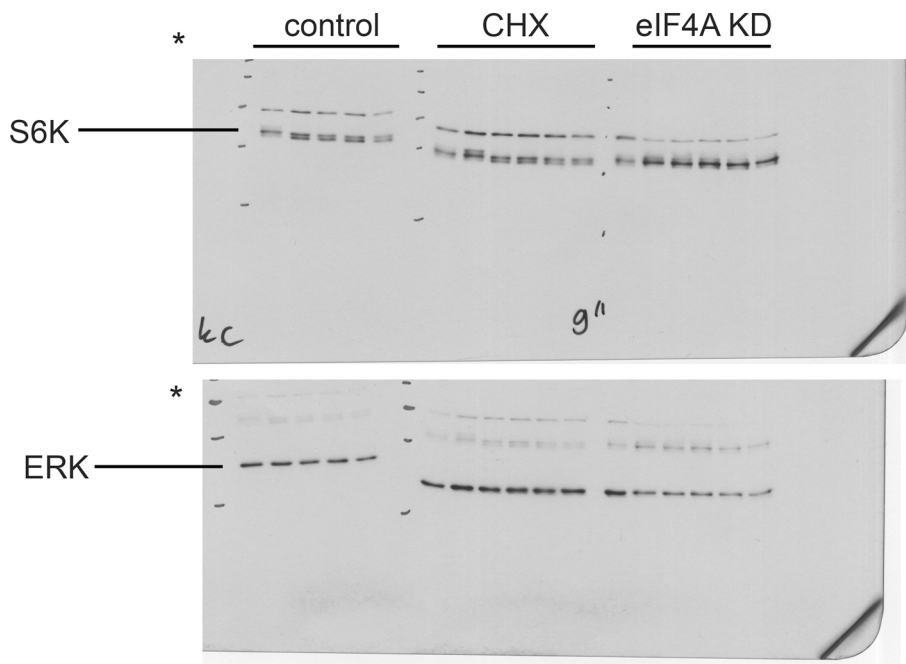

\* The membranes of S6K were reblotted with the ERK antibody.
