# Supplementary material for: eIF4A inactivates TORC1 in response to amino acid starvation
Source: PubMed Central journal article supplement (PMC4868951; doi:10.15252/embj.201593118), 2016-03-17

# Figure 3a

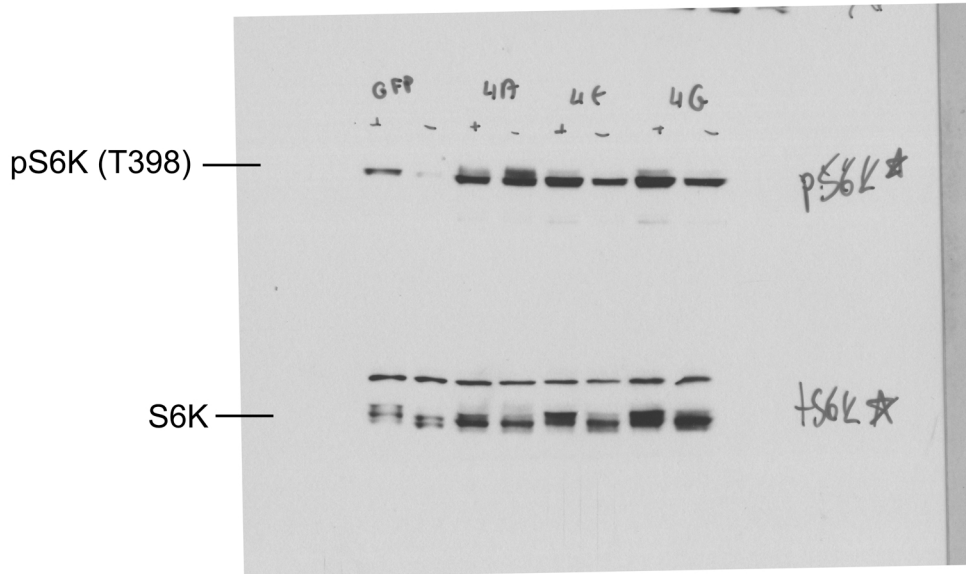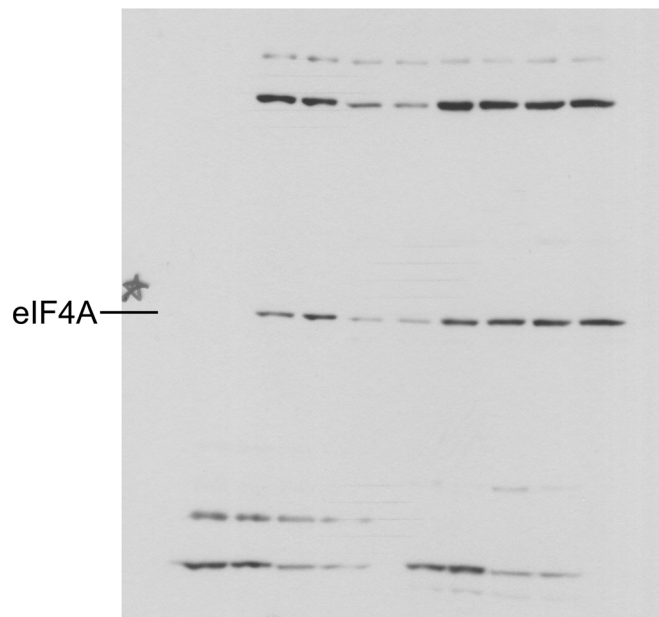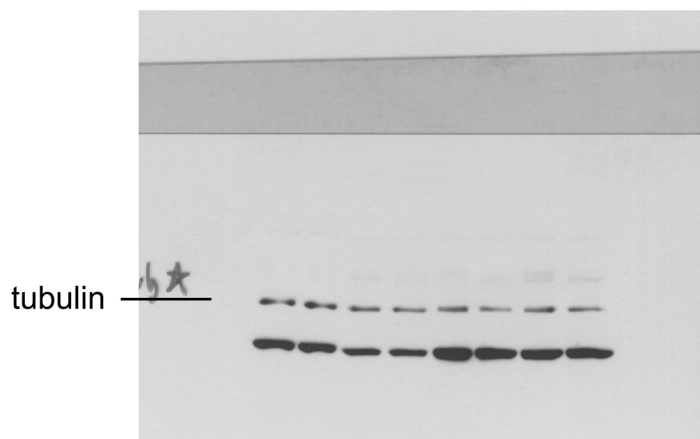

Supplement: EMBJ-35-1058-s005.pdf [file EMBJ-35-1058-s005.pdf]
