# Supplementary material for: eIF4A inactivates TORC1 in response to amino acid starvation
Source: PubMed Central journal article supplement (PMC4868951; doi:10.15252/embj.201593118), 2016-03-17
Supplement: EMBJ-35-1058-s006.pdf [file EMBJ-35-1058-s006.pdf]

# Figure 4a

Figure 4a corresponds to lanes 3-6 on all blots

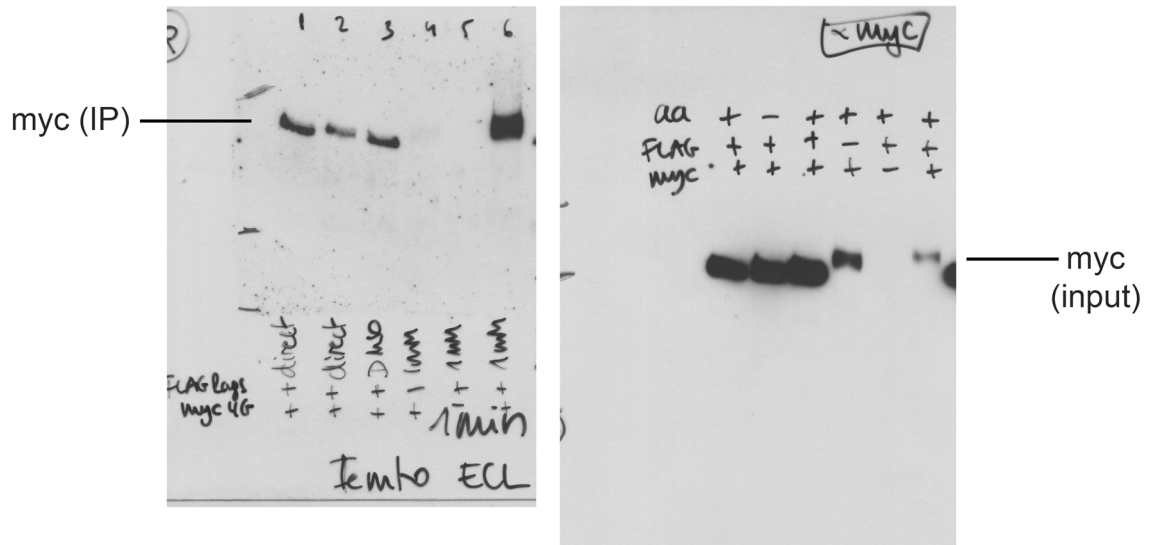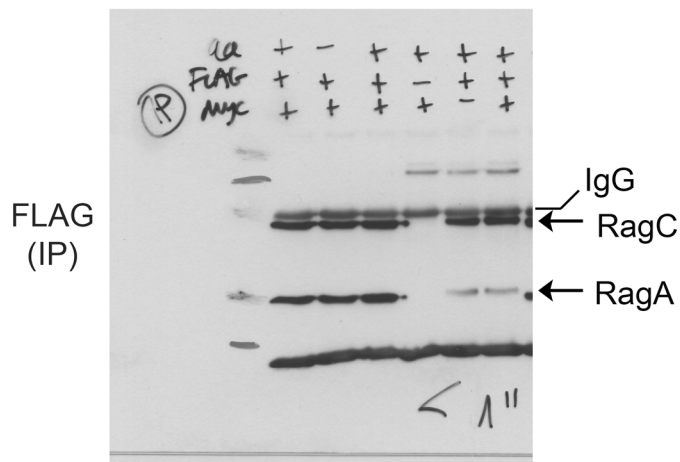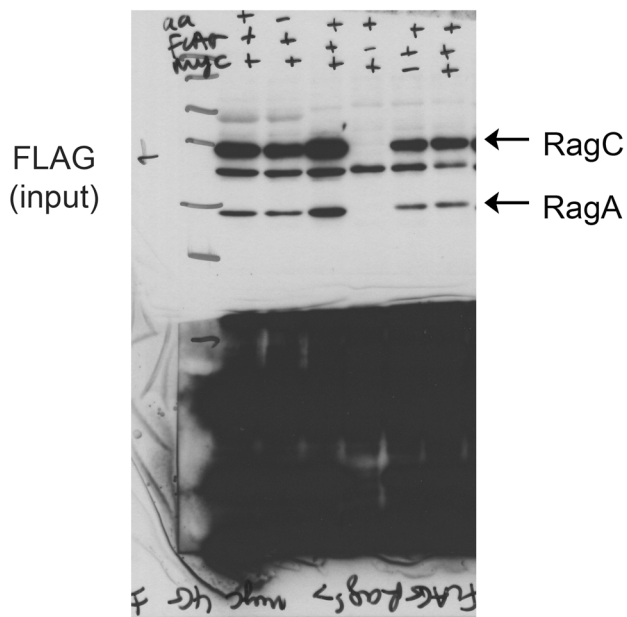

# Figure 4b

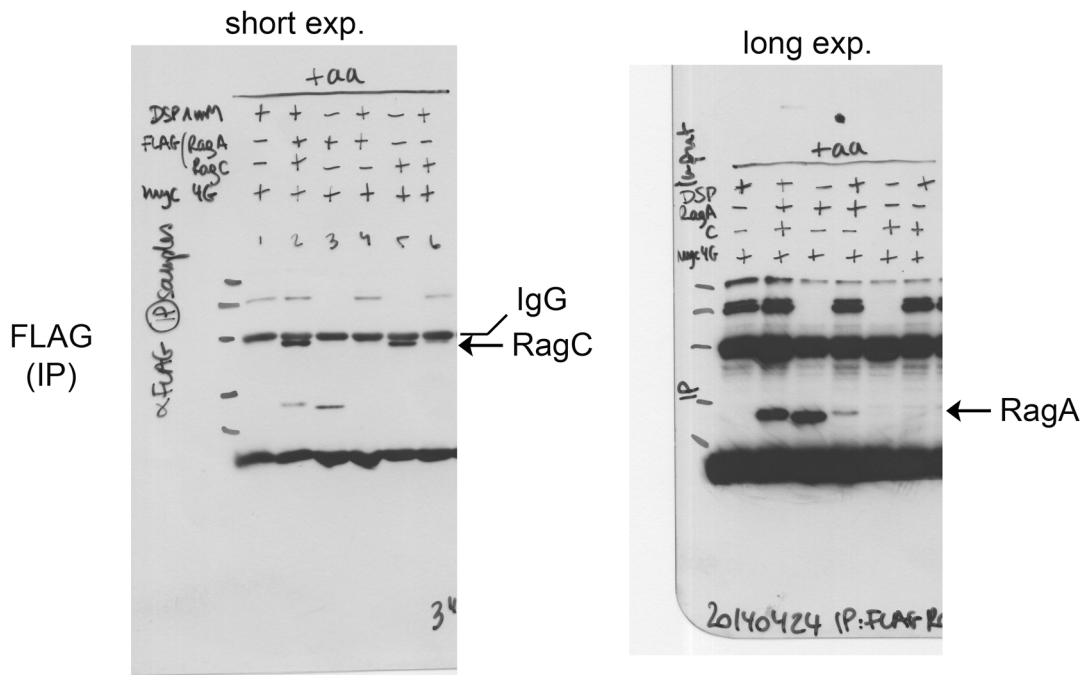

FLAG-RagA and FLAG-RagC were detected on the same membrane incubated with mouse anti-FLAG antibody. Different exposures were used for the figure.

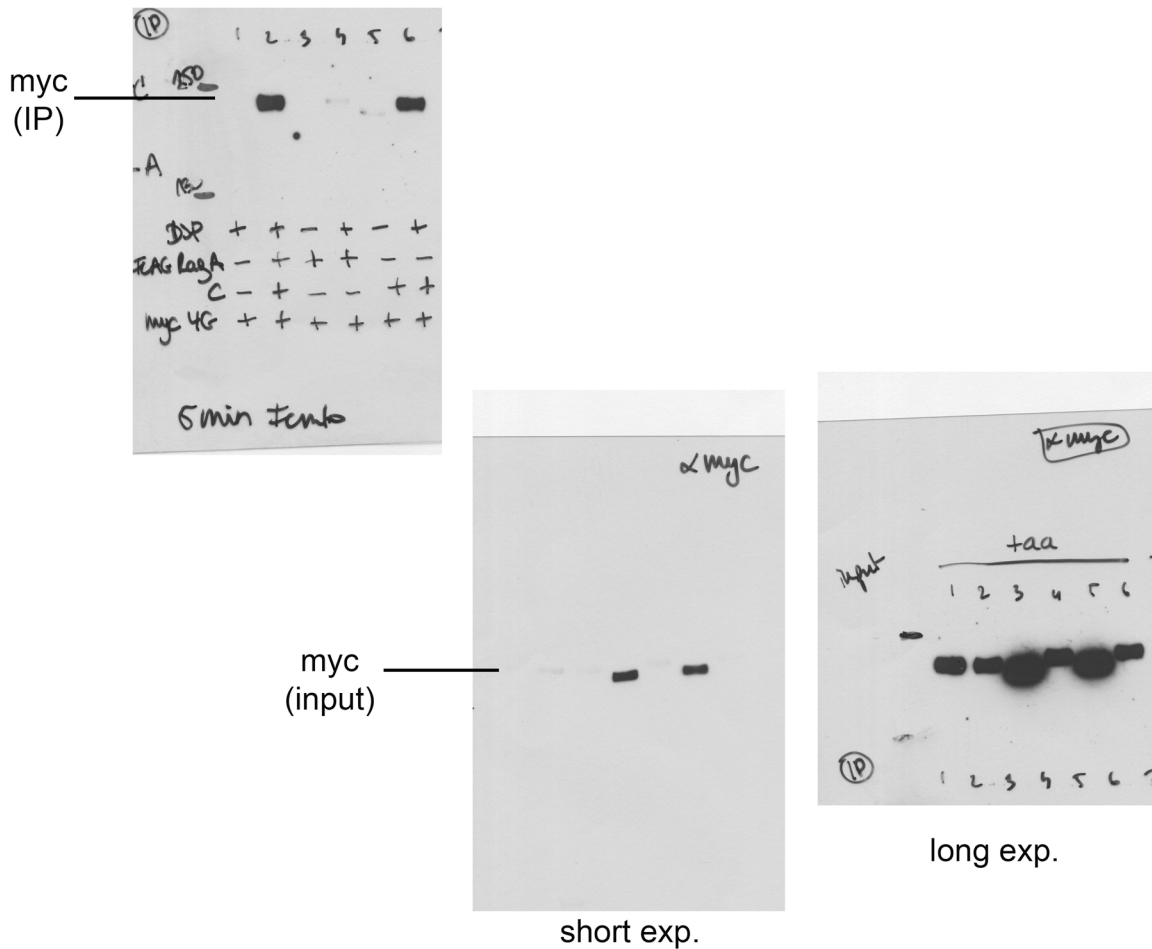

# Figure 4c

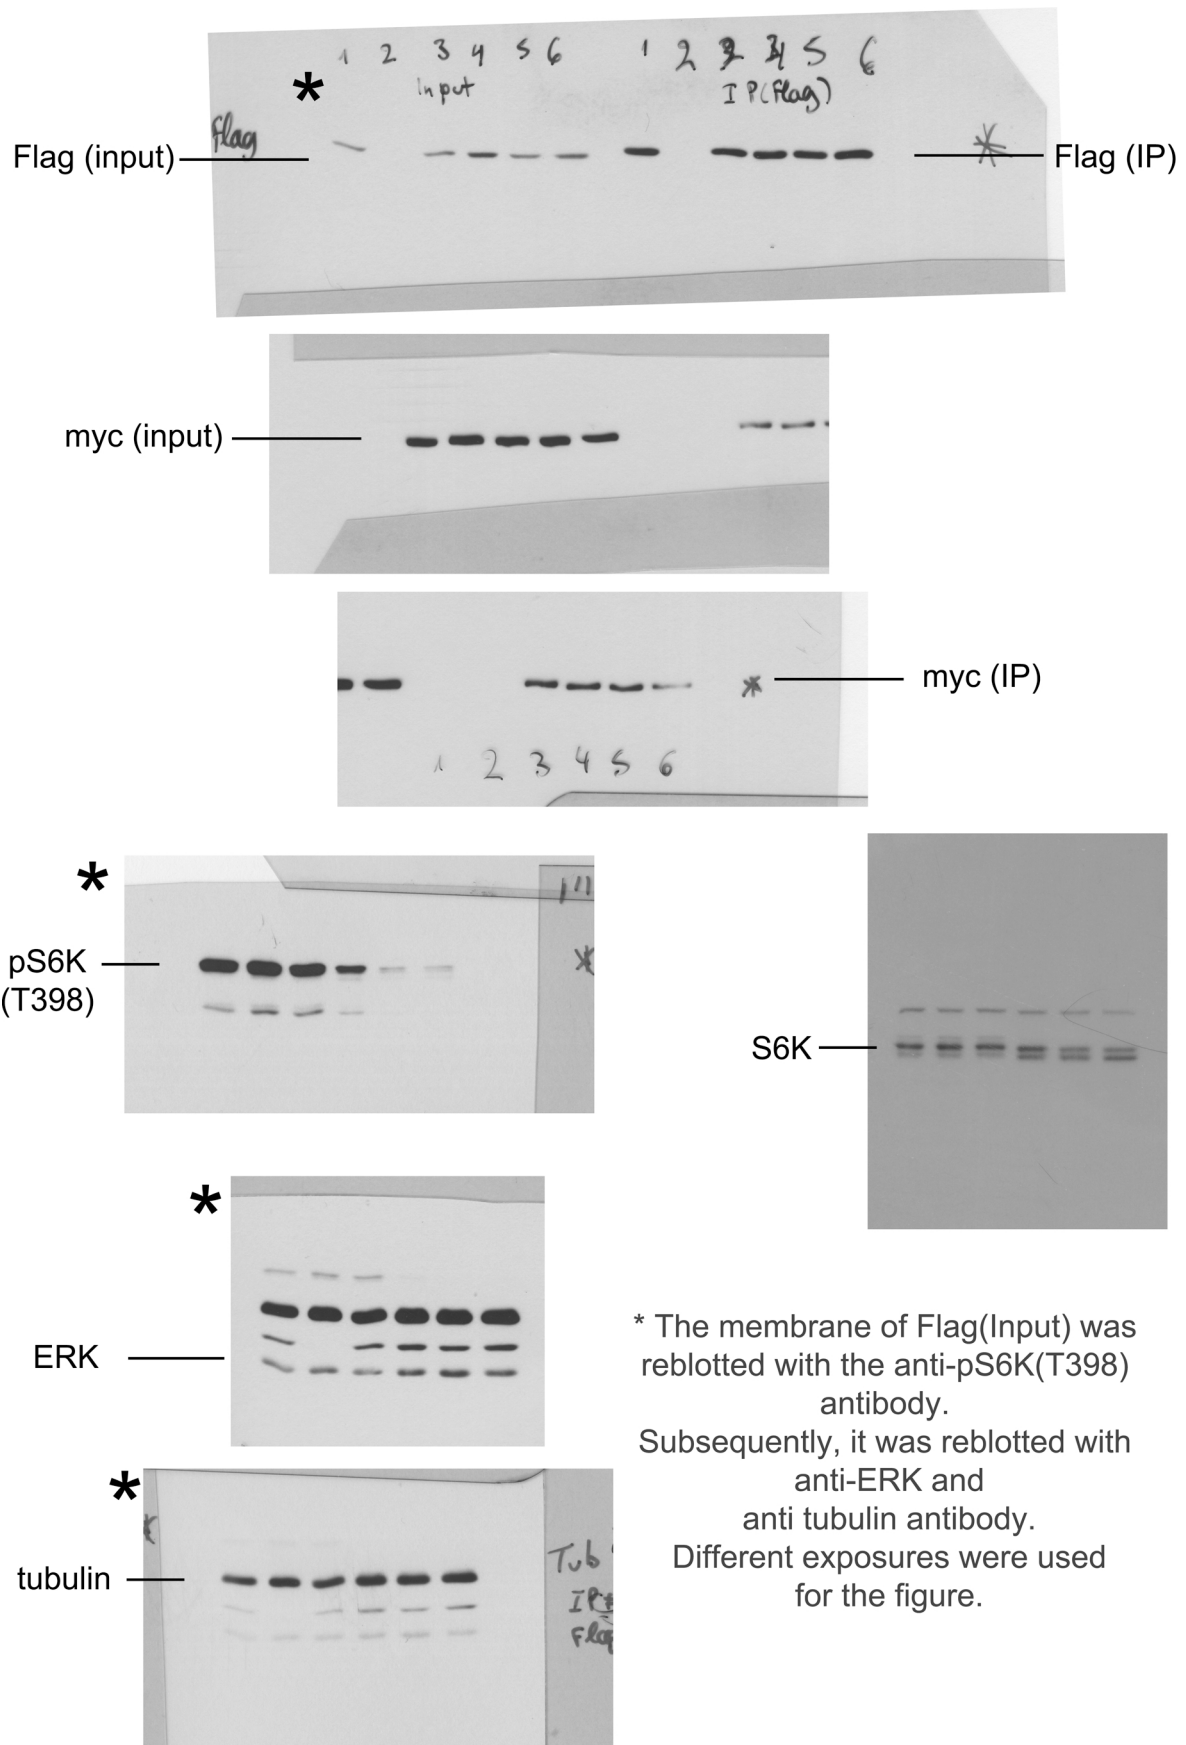

\* The membrane of Flag(Input) was reblotted with the anti-pS6K(T398) antibody. Subsequently, it was reblotted with anti-ERK and anti tubulin antibody. Different exposures were used for the figure.
