# Supplementary material for: eIF4A inactivates TORC1 in response to amino acid starvation
Source: PubMed Central journal article supplement (PMC4868951; doi:10.15252/embj.201593118), 2016-03-17
Supplement: EMBJ-35-1058-s008.pdf [file EMBJ-35-1058-s008.pdf]

# Figure 6b 1/2

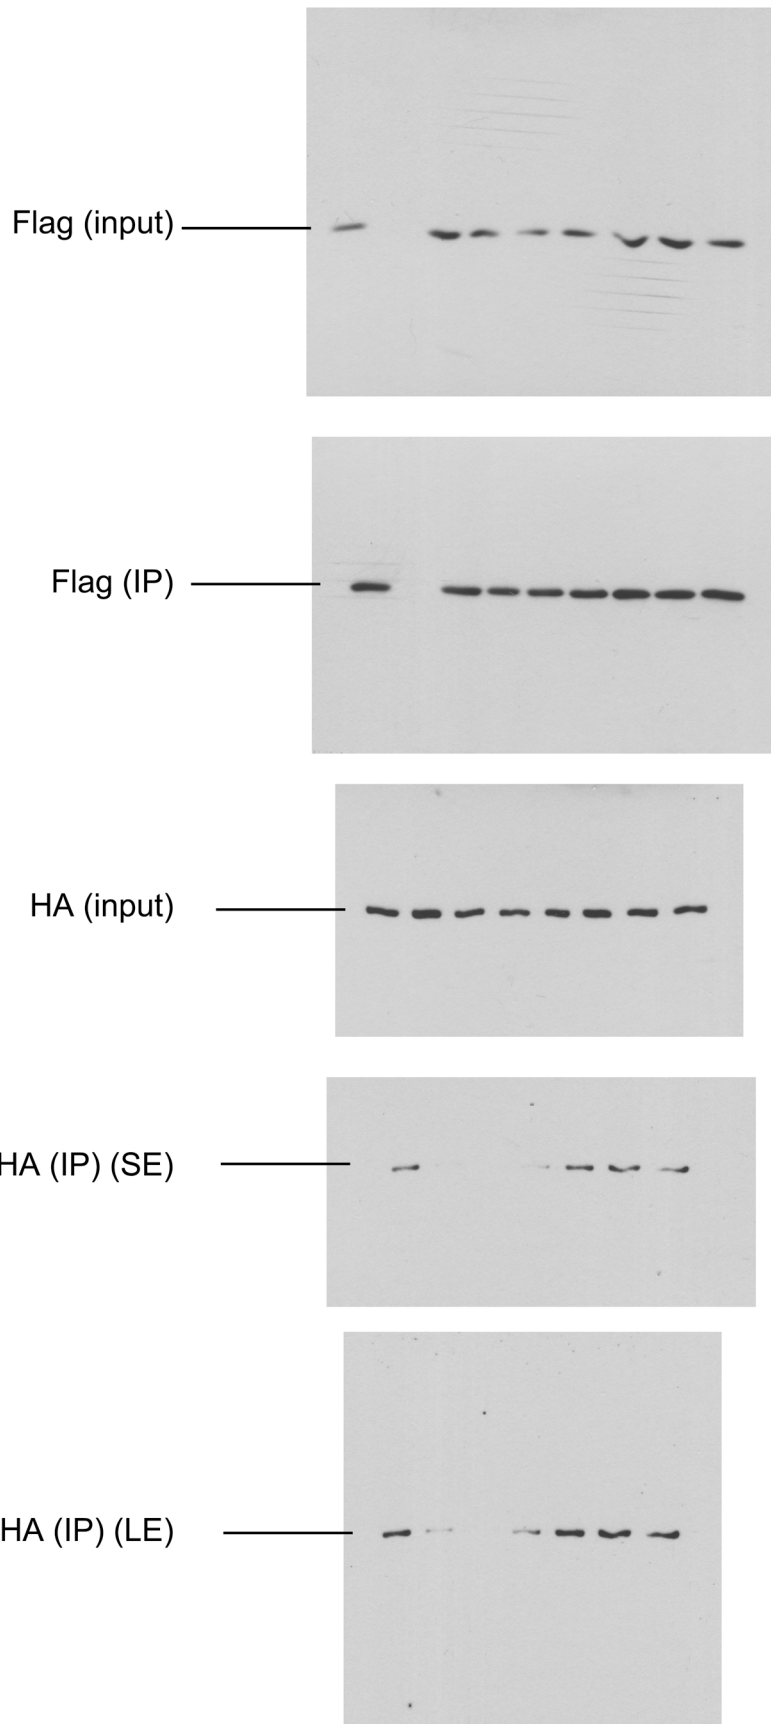

# Figure 6b 2/2

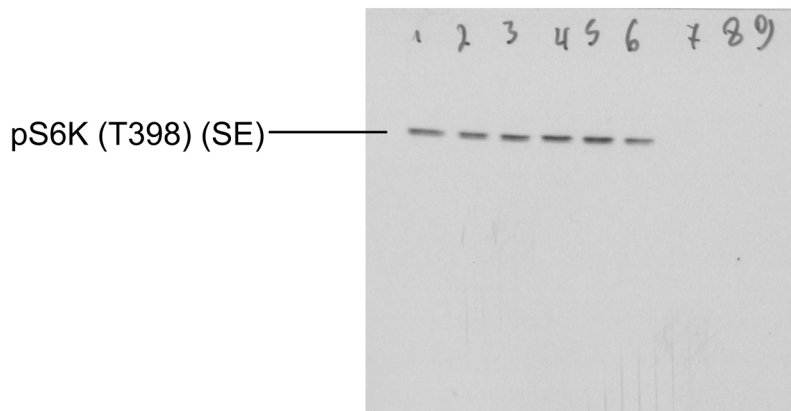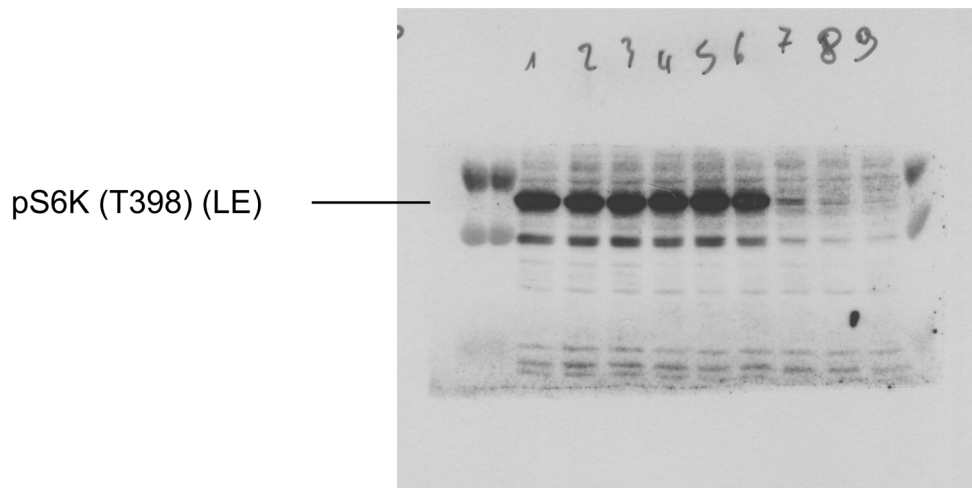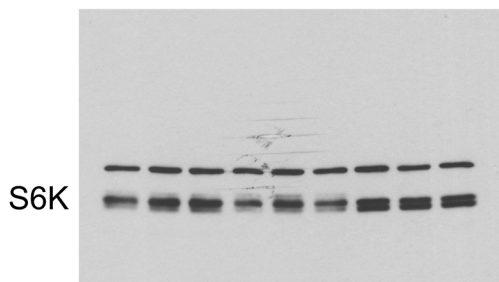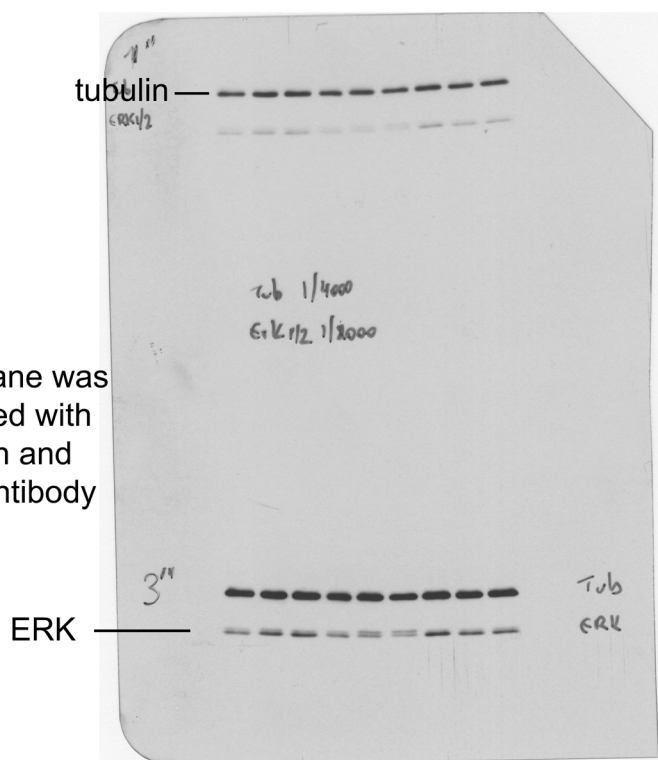

The membrane was co-incubated with anti-tubulin and anti-ERK antibody

# Figure 6c

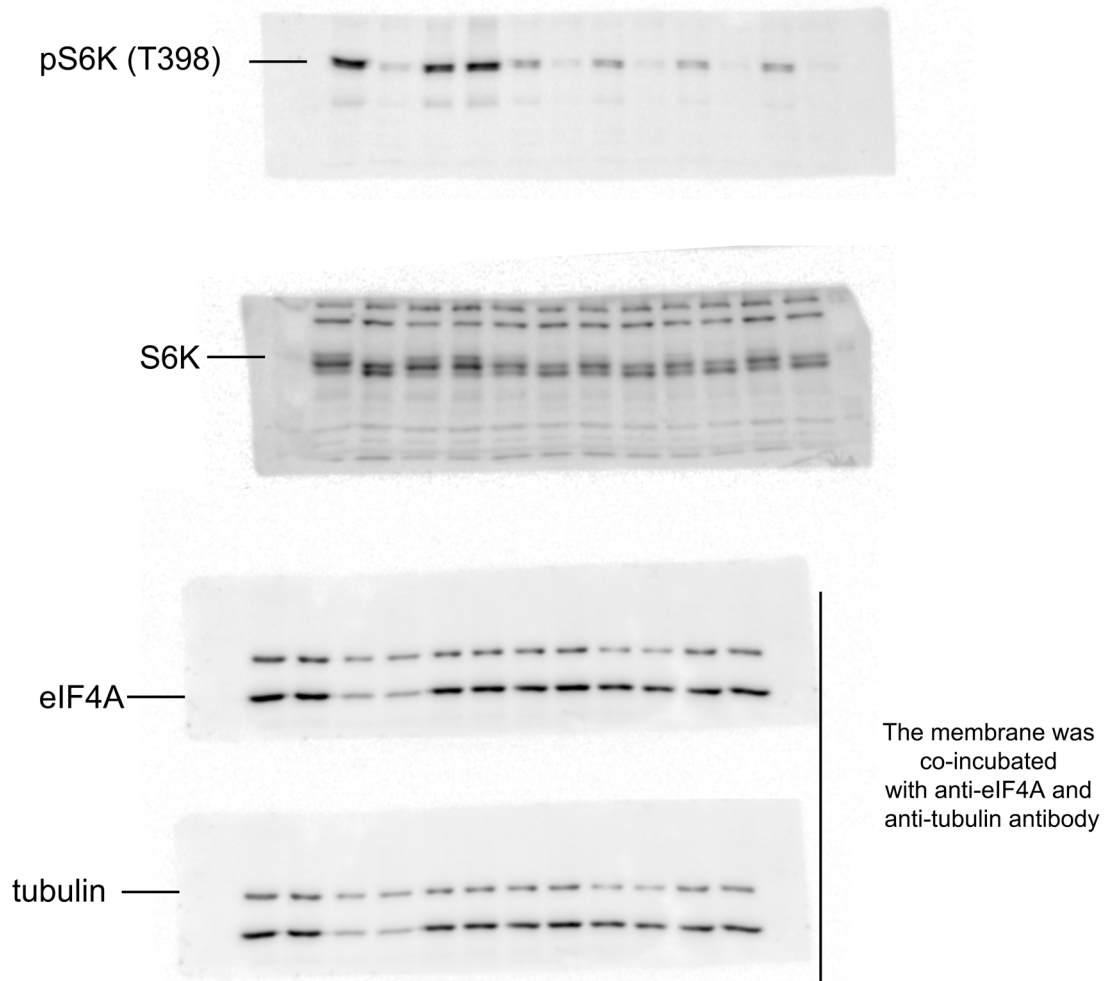

# Figure 6d

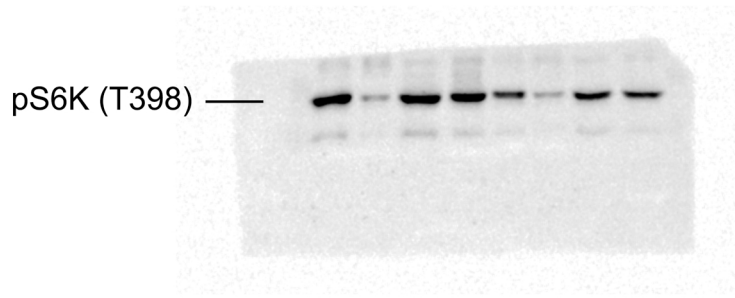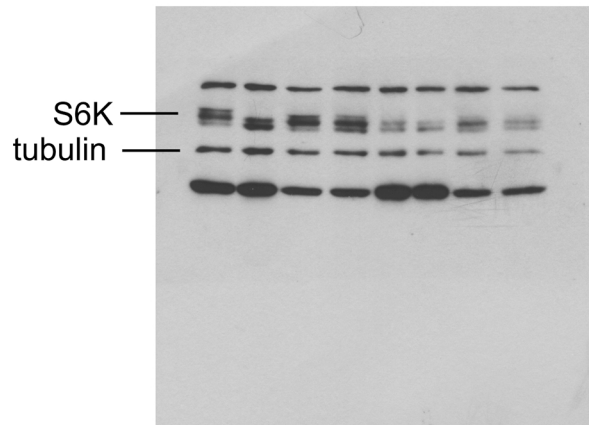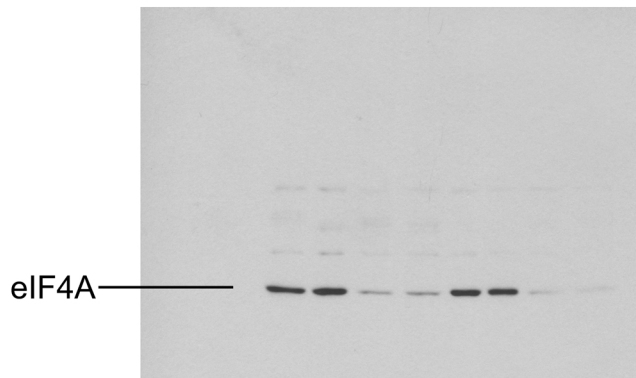

The membrane was co-incubated with anti-S6K, anti-tubulin and anti-eIF4A and antibody. Different exposures were used for the figure.

# Figure 6e

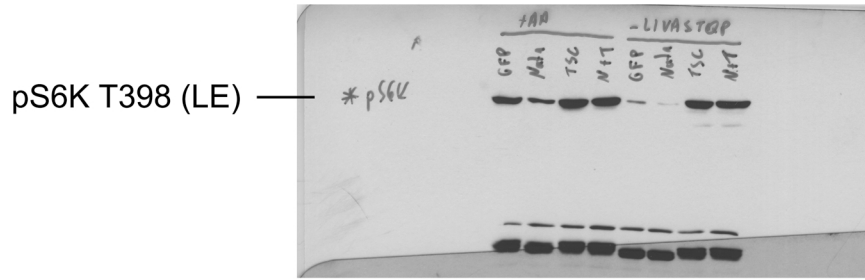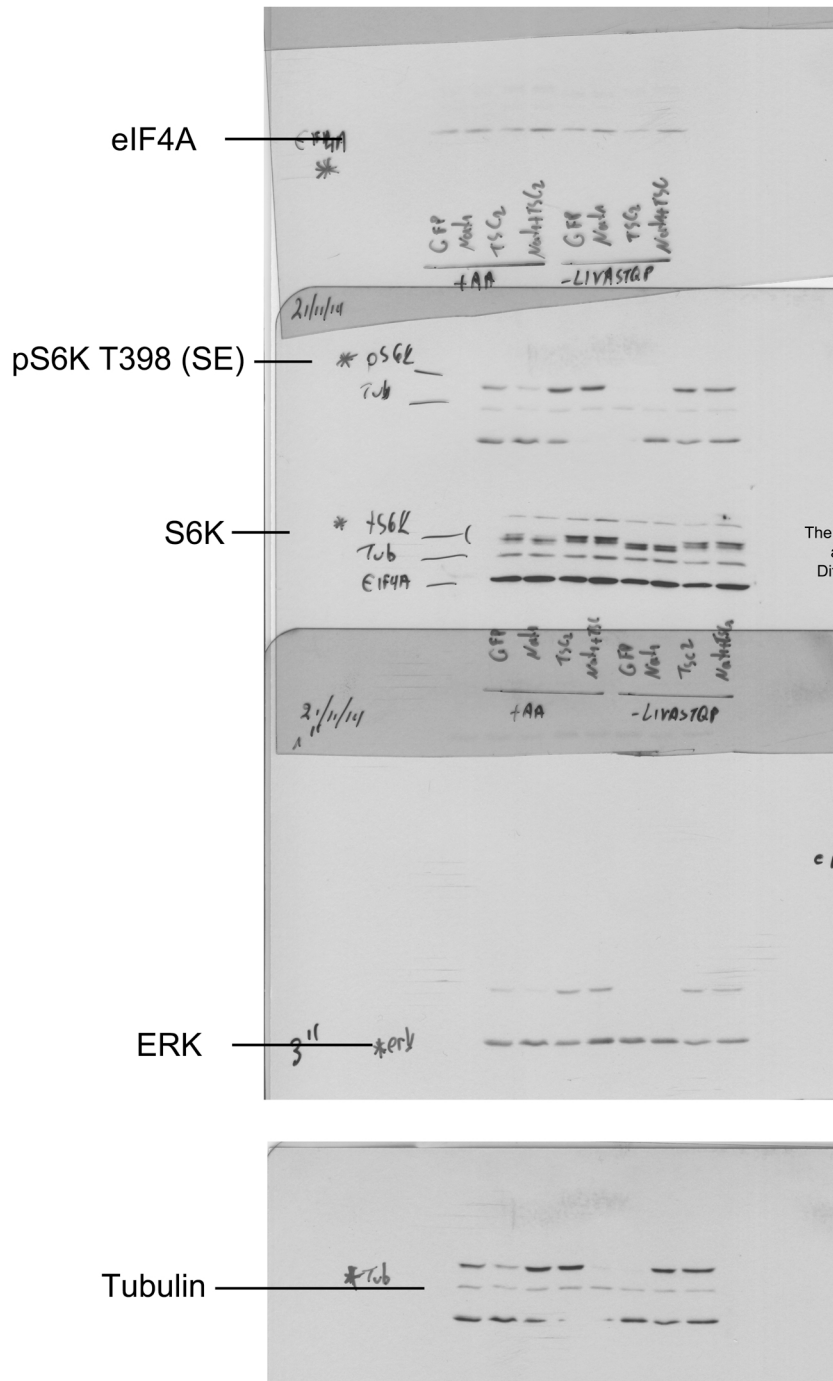

The membrane was co-incubated with anti-S6K, anti-tubulin and anti-eIF4A and antibody. Different exposures were used for the figure.

\*The membrane was co-incubated with anti-pS6K (T398), anti-tubulin antibody and anti-ERK antibody. Different exposures were used for the figure.
